# Supplementary material for: Molecular basis for the bifunctional Uba4–Urm1 sulfur‐relay system in tRNA thiolation and ubiquitin‐like conjugation
Source: PubMed Central journal article supplement (PMC7527816; doi:10.15252/embj.2020105087), 2020-09-09
Supplement: EMBJ-39-e105087-s001.pdf [file EMBJ-39-e105087-s001.pdf]

# Appendix

## **Molecular basis for the bifunctional Uba4-Urm1 sulfur relay system in tRNA thiolation and ubiquitin-like conjugation**

Marta Pabis<sup>1,#</sup>, Martin Termathe<sup>2,#</sup>, Keerthiraju E. Ravichandran<sup>1,3,#</sup>, Sandra D. Kienast<sup>2,4</sup>,  
Rościsław Krutyhołowa<sup>1,5</sup>, Mikołaj Sokołowski<sup>1,3</sup>, Urszula Jankowska<sup>1</sup>, Przemysław Grudnik<sup>1</sup>,  
Sebastian A. Leidel<sup>2,4,\*</sup> and Sebastian Glatt<sup>1,\*</sup>

<sup>1</sup> Malopolska Centre of Biotechnology (MCB), Jagiellonian University, Krakow, Poland

<sup>2</sup> Max Planck Institute for Molecular Biomedicine, Von-Esmarch-Str. 54, 48149 Muenster, Germany.

<sup>3</sup> Postgraduate School of Molecular Medicine, Warsaw, Poland

<sup>4</sup> Department of Chemistry and Biochemistry, University of Bern, Freiestrasse 3, 3012 Bern, Switzerland

<sup>5</sup> Faculty of Biochemistry, Biophysics and Biotechnology, Jagiellonian University, Krakow, Poland.

# these authors contributed equally

\* Correspondence to SAL (sebastian.leidel@dcb.unibe.ch) and SG (sebastian.glatt@uj.edu.pl)

Key words: thiolation, tRNA modification, adenylation, UBL, thioester

Running title: Structure and Function of Uba4

## 1 **Table of Contents**

## 2 **Appendix Figures**

- 3     ○ S1 - Multiple sequence alignment of eukaryotic and prokaryotic homologues of
- 4         *CtUba4*.
- 5     ○ S2 - Analyses of *CtUba4* surface properties.
- 6     ○ S3 - Yeast control experiments.
- 7     ○ S4 - SEC profiles.

## 8 **Appendix Tables**

- 9     ○ S1 - Thermostability of *CtUba4* proteins.
- 10    ○ S2 - Activity assays of all *CtUba4* mutants *in vitro*.
- 11    ○ S3 - Yeast strains used in this study
- 12    ○ S4 - Results of mass spectrometry analysis of Urm1 conjugation site.

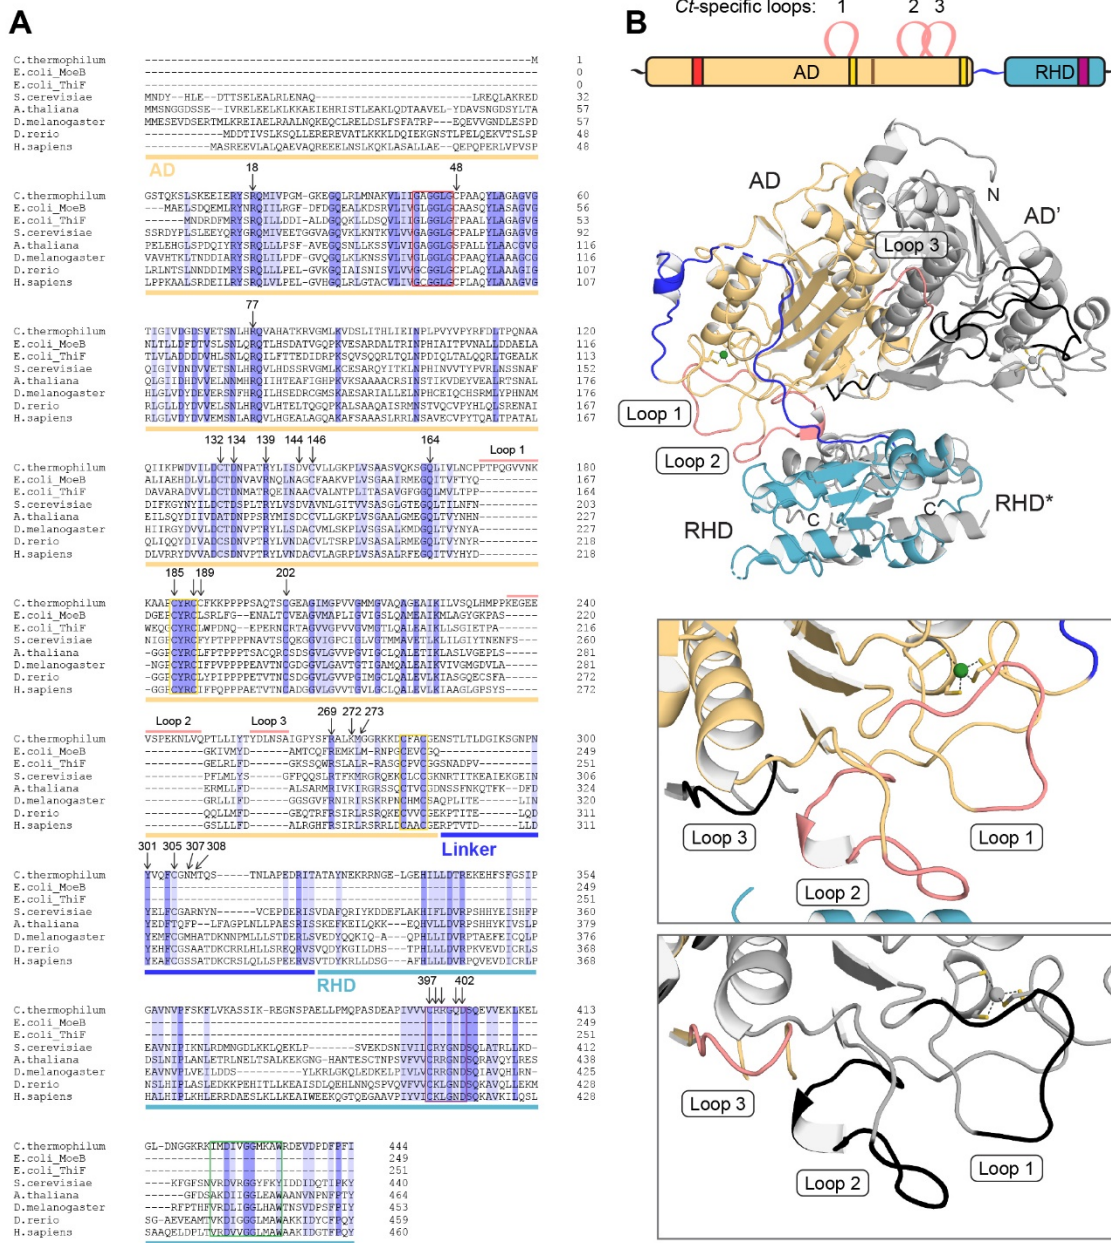

1

2 **Appendix Figure S1. Multiple sequence alignment of eukaryotic and prokaryotic**  
3 **homologues of CtUba4.** (A) Sequence alignment of CtUba4 with selected eukaryotic and  
4 prokaryotic homologues. Completely conserved residues (dark blue) and residues that are  
5 exchanged by a similar residue (light blue) are highlighted. Boxed areas indicate the conserved  
6 active loops in the AD (red) and RHD (purple), the Cys-X-X-Cys zinc ion coordination (yellow)  
7 and the rhodanese domain signature (green) motifs. Ct-specific sequences are marked by pink  
8 lines. (B) Schematic representation of the CtUba4 domain organization with indication of the  
9 localization of Ct-specific loops. Cartoon representation of the CtUba4 structure with Ct-  
10 specific loops colored in pink and black. Zoomed views of loops of each CtUba4 molecule from  
11 the asymmetric unit. (C) Summary of sequence identity and similarity between Ct proteins and  
12 their eukaryotic homologues.

13

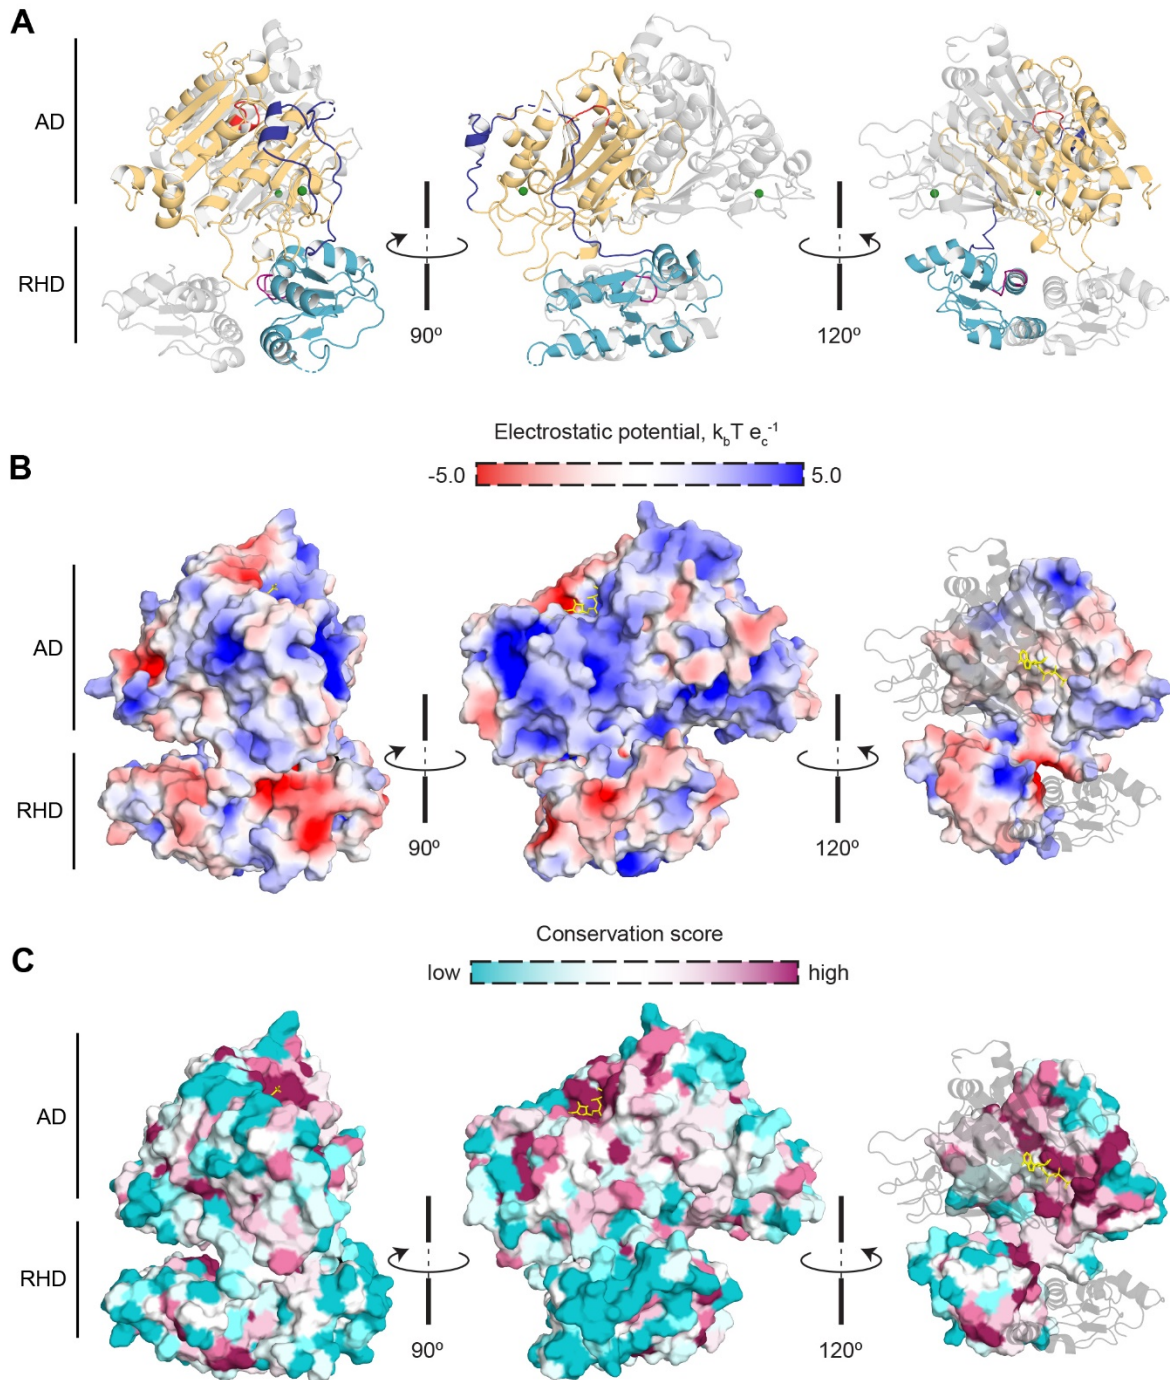

1

2 **Appendix Figure S2. Analyses of CtUba4 surface properties.** (A) Cartoon representation of  
 3 the CtUba4 homodimer indicating the AD (yellow) and RHD (cyan). (B) Surface electrostatic  
 4 potential of the CtUba4 homodimer (left and middle) and the dimerization interface (right). (C)  
 5 Analysis of surface conservation of Uba4 using sequences from five fungi (*Saccharomyces*  
 6 *cerevisiae*, *Candida glabrata*, *Schizosaccharomyces pombe*, *Aspergillus niger*, *Chaetomium*  
 7 *thermophilum*), five plants (*Arabidopsis thaliana*, *Nicotiana tabacum*, *Physcomitrella patens*  
 8 *subsp. Patens*, *Zea mays*, *Oryza sativa subsp. japonica*) and five animals (*Danio rerio*, *Gallus*  
 9 *gallus*, *Bos Taurus*, *Mus musculus*, *Homo sapiens*). Surface conservation of the CtUba4  
 10 homodimer (left and middle) and the dimerization interface (right). (B-C) ATP (yellow) was  
 11 positioned within the nucleotide-binding pocket according to the ATP bound *EcMoeB-MoaD*  
 12 structure (PDB ID: 1JWA).

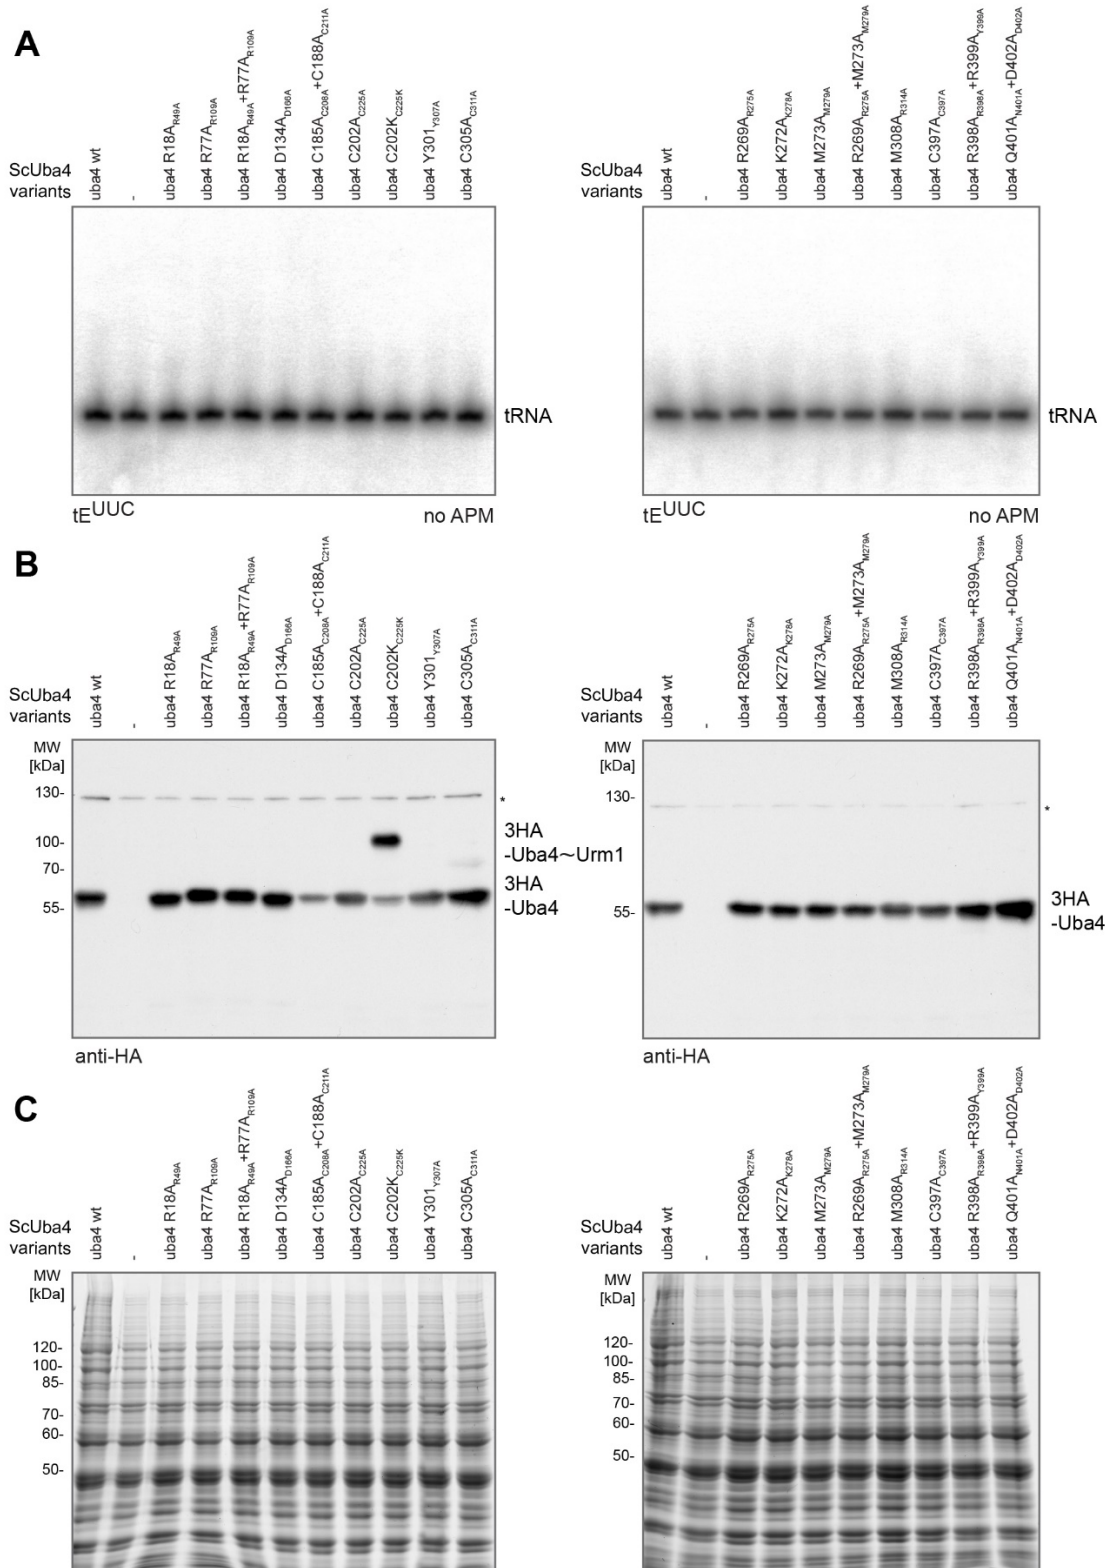

1

2 **Appendix Figure S3 Yeast control experiments.** (A) Northern blot analysis of tRNA on a  
 3 standard PAGE. Control gel to show equal RNA extraction efficiency and loading. (B) Western  
 4 blot analysis to investigate expression pattern of different 3HA-tagged *ScUba4* mutants.  
 5 Asterisk (\*) indicates an unspecific signal. (C) Analysis of total protein extracts from different  
 6 *ScUba4* mutant yeast strains used in b on a separate SDS-PAGE. Control gel to demonstrate  
 7 equal protein extraction efficiency and loading. All residue numbering follows *CtUba4*  
 8 sequence, but the respective *ScUba4* numbering is added in subscript.

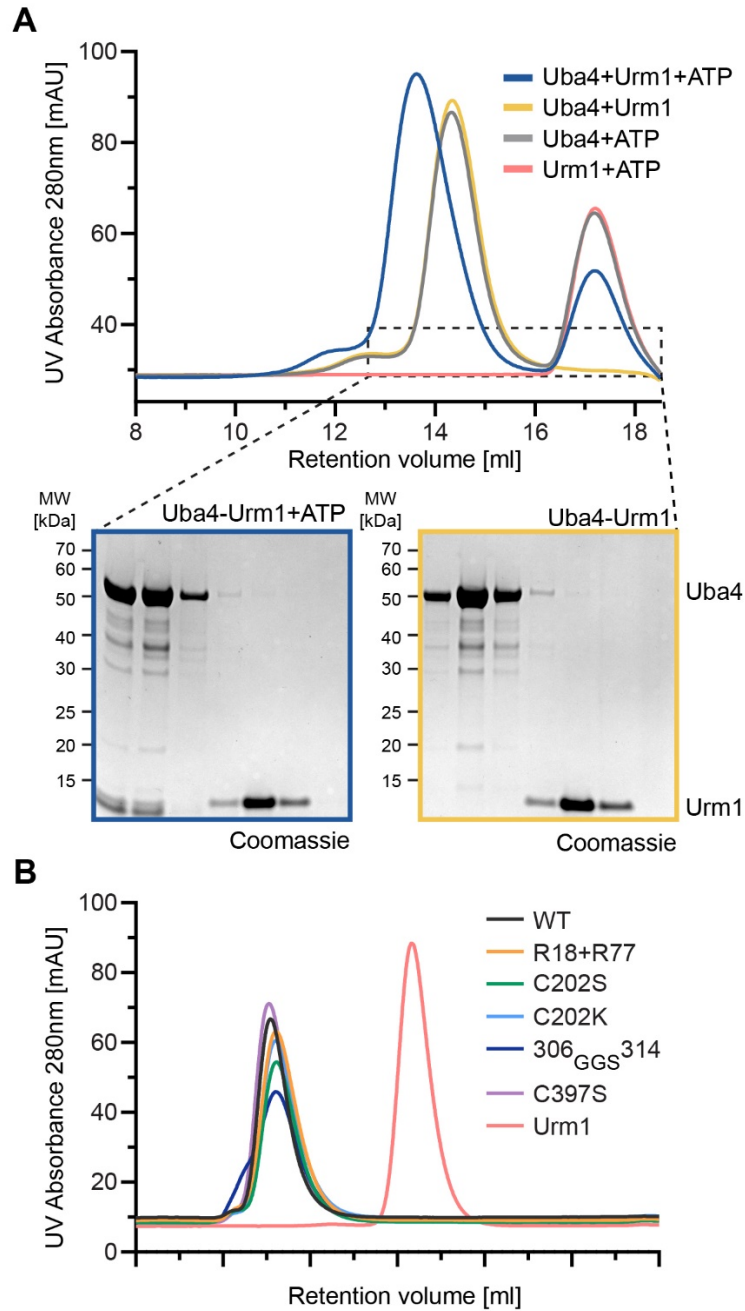

1

2 **Appendix Figure S4 SEC profiles.** (A) Co-migration analyses of *CtUba4* and *CtUrm1* using  
 3 size exclusion chromatography. *CtUba4* alone, *CtUrm1* alone and *CtUba4* together with  
 4 *CtUrm1* were incubated with ATP and applied on Superdex 200 Increase 10/300 GL column.  
 5 *CtUba4* together with *CtUrm1* without ATP served as control. Fractions containing the complex  
 6 or the individual proteins were separated on SDS-PAGE. The gel was stained with Coomassie.  
 7 Complex formation of *CtUba4* and *CtUrm1* in the presence of ATP is visible due to the shift of  
 8 the peak and the appearance of Urm1 in the respective fractions using SDS-PAGE. (B) SEC  
 9 profiles of purified recombinant proteins, namely *CtUrm1*, *CtUba4* WT and indicated mutants.  
 10 AU, arbitrary units.

1 **Appendix Table S1 Thermostability of CtUba4 proteins.** (top) Influence of nucleotides and  
 2 nucleotide derivatives on the thermostability profile of full-length CtUba4. Thermostability of  
 3 selected CtUba4 mutants. (bottom) Thermostability data (the plotted value corresponds to 50%  
 4 of the protein being unfolded) for all CtUba4 mutants in the absence of nucleotides and in the  
 5 presence of 1 mM AMP or 1 mM ATP, respectively.

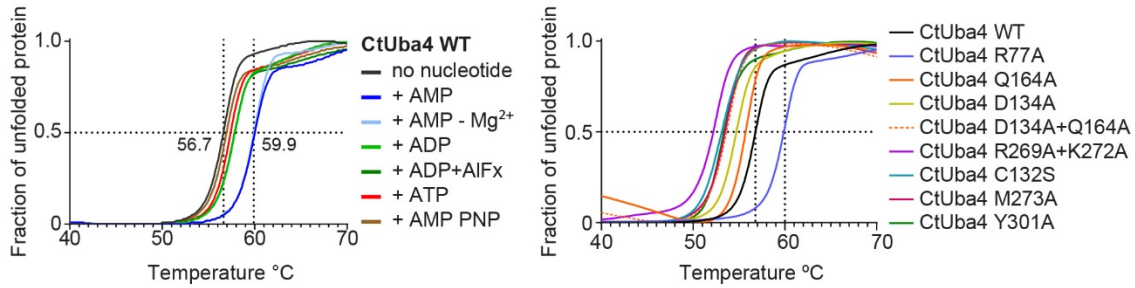

| ScUba4                     | CtUba4                     | no nucleotide |     | AMP  |     |      | ATP  |     |      |
|----------------------------|----------------------------|---------------|-----|------|-----|------|------|-----|------|
|                            |                            | mean          | SD  | mean | SD  | Δ    | mean | SD  | Δ    |
| WT                         | WT                         | 56.8          | 0.1 | 59.9 | 0.2 | 3.1  | 57.4 | 0.1 | 0.6  |
| AD                         | AD                         | 47.1          | 0.4 | 53.9 | 0.3 | 6.8  | 49.4 | 0.5 | 2.2  |
| AD <sub>linker 1-320</sub> | AD <sub>linker 1-315</sub> | 58.1          | 0.1 | 61.4 | 0.2 | 3.3  | 58.8 | 0.1 | 0.7  |
| AD <sub>linker 1-326</sub> | AD <sub>linker 1-321</sub> | 58.2          | 0.1 | 61.6 | 0.1 | 3.5  | 59.0 | 0.1 | 0.8  |
| C225                       | C202S                      | 56.9          | 0.1 | 60.1 | 0.2 | 3.2  | 57.5 | 0.1 | 0.5  |
| C225                       | C202A                      | 57.4          | 0.2 | 60.7 | 0.2 | 3.3  | 57.9 | 0.1 | 0.5  |
| C311                       | C305S                      | 56.4          | 0.1 | 59.5 | 0.2 | 3.1  | 56.9 | 0.1 | 0.5  |
| C397                       | C397S                      | 58.8          | 0.1 | 61.5 | 0.2 | 2.7  | 59.2 | 0.1 | 0.4  |
| C225+C397                  | C202S+C397S                | 59.0          | 0.1 | 61.6 | 0.2 | 2.6  | 59.5 | 0.1 | 0.5  |
| C225+C311                  | C202S+C305S                | 56.6          | 0.1 | 59.7 | 0.2 | 3.1  | 57.1 | 0.1 | 0.5  |
| C225+T193/P214/T215        | C202S+K161A/K191A/K192A    | 57.9          | 0.1 | 61.2 | 0.2 | 3.3  | 58.3 | 0.1 | 0.3  |
| C311                       | C305A                      | 56.6          | 0.1 | 59.8 | 0.2 | 3.2  | 57.1 | 0.1 | 0.5  |
| R49                        | R18A                       | 56.7          | 0.1 | 59.4 | 0.2 | 2.7  | 56.4 | 0.1 | -0.2 |
| R109                       | R77A                       | 60.0          | 0.1 | 60.9 | 0.2 | 0.9  | 59.8 | 0.1 | -0.2 |
| R49+R109                   | R18A+R77A                  | 59.2          | 0.1 | 59.4 | 0.1 | 0.2  | 58.8 | 0.1 | -0.4 |
| D166                       | D134A                      | 54.7          | 0.1 | 59.5 | 0.2 | 4.7  | 55.8 | 0.2 | 1.1  |
| Q196                       | Q164A                      | 55.9          | 0.2 | 60.1 | 0.3 | 4.2  | 57.0 | 0.2 | 1.1  |
| D176                       | D144A                      | 57.0          | 0.2 | 60.4 | 0.2 | 3.4  | 57.6 | 0.2 | 0.6  |
| R275                       | R269A                      | 54.9          | 0.1 | 59.0 | 0.2 | 4.0  | 55.8 | 0.2 | 0.9  |
| R275+K278                  | R269A+K272A                | 52.6          | 0.2 | 57.0 | 0.2 | 4.4  | 53.6 | 0.2 | 1.0  |
| Y307                       | Y301A                      | 53.1          | 0.1 | 58.5 | 0.2 | 5.4  | 53.9 | 0.2 | 0.8  |
| -                          | N307A+M308A                | 57.0          | 0.2 | 60.4 | 0.2 | 3.4  | 57.6 | 0.2 | 0.5  |
| R398+Y399                  | R398A+R399A                | 55.6          | 0.2 | 60.1 | 0.3 | 4.4  | 56.9 | 0.2 | 1.3  |
| N401+D402                  | Q401A+D402A                | 55.4          | 0.2 | 60.1 | 0.3 | 4.7  | 56.8 | 0.2 | 1.4  |
| D166+Q196                  | D134A+Q164A                | 53.9          | 0.1 | 59.0 | 0.2 | 5.1  | 55.4 | 0.2 | 1.5  |
| -                          | (306-14) GGS               | 56.3          | 0.1 | 60.2 | 0.1 | 3.9  | 57.3 | 0.1 | 1.0  |
| C80                        | C48S                       | 55.6          | 0.3 | 57.4 | 0.1 | 1.7  | 55.5 | 0.1 | -0.1 |
| C164                       | C132S                      | 53.0          | 0.2 | 57.4 | 0.2 | 4.3  | 53.9 | 0.1 | 0.8  |
| A178                       | C146S                      | 55.3          | 0.2 | 59.1 | 0.1 | 3.7  | 56.0 | 0.1 | 0.7  |
| F212                       | C189S                      | 56.7          | 0.1 | 59.0 | 0.1 | 2.3  | 56.8 | 0.2 | 0.1  |
| K278                       | K272A                      | 54.9          | 0.1 | 58.7 | 0.1 | 3.8  | 55.7 | 0.1 | 0.8  |
| C225                       | C202K                      | 57.5          | 0.1 | 60.7 | 0.1 | 3.3  | 58.2 | 0.1 | 0.7  |
| R171                       | R139A                      | 55.5          | 0.1 | 60.4 | 0.2 | 4.8  | 56.7 | 0.1 | 1.2  |
| M279                       | M273A                      | 53.7          | 0.2 | 57.7 | 0.1 | 4.1  | 54.4 | 0.2 | 0.7  |
| R171+G192                  | R139A+Q164A                | 55.8          | 0.2 | 60.8 | 0.2 | 5.0  | 57.4 | 0.2 | 1.5  |
| C208+C211                  | C185S+C188S                | 56.8          | 0.2 | 60.3 | 0.2 | 3.5  | 57.4 | 0.2 | 0.6  |
| RHD                        | RHD                        | 56.4          | 0.4 | 56.3 | 0.3 | 0.0  | 55.4 | 0.3 | -0.9 |
| R398+Y399 on RHD           | R398A+R399A on RHD         | 52.6          | 0.3 | 52.4 | 0.4 | -0.2 | 52.1 | 0.1 | -0.6 |
| N401+D402 on RHD           | Q401A+D402A on RHD         | 52.8          | 0.3 | 53.0 | 0.2 | 0.2  | 52.2 | 0.2 | -0.6 |
| C397 on RHD                | C397S on RHD               | 63.0          | 0.3 | 62.7 | 0.5 | -0.3 | 62.6 | 0.3 | -0.4 |

6

7

1 **Appendix Table S2 Activity assays of all *CtUba4* mutants *in vitro*.** Tabular summary of three  
2 assays addressing the ATP hydrolysis by *CtUba4* WT and mutants in the presence of *CtUrm1*.  
3 In the first assay, the amount of released PPi was measured using a fluorometric pyrophosphate  
4 assay kit. In the second assay, after PPi hydrolysis to Pi by inorganic phosphatase, Pi was  
5 detected using Malachite Green Phosphate Assay kit. In the third assay, the reaction mixture  
6 was separated on a SEC column and the area under the peak corresponding to ATP (of UV  
7 absorbance at 255 nm) was calculated using the UNICORN 7.0 software. The decrease of the  
8 ATP peak area correlates with ATP consumption by Uba4 during Urm1 C-terminus  
9 adenylation. Changes in enzymatic activity are indicated as a color gradient from blue to red,  
10 normalized to *CtUba4* WT. PPi: pyrophosphate; Pi: inorganic phosphate; SD: standard  
11 deviation.

| ScUba4                     | CtUba4                     | PPi [uM] |      | Pi [uM] |      | ATP peak area |
|----------------------------|----------------------------|----------|------|---------|------|---------------|
|                            |                            | mean     | SD   | mean    | SD   | (255 nm)      |
| WT                         | WT                         | 0.85     | 0.18 | 302.4   | 22.0 | 24.6          |
| AD                         | AD                         | 0.58     | 0.21 | 193.8   | 18.2 | 28.1          |
| AD <sub>linker 1-320</sub> | AD <sub>linker 1-315</sub> | 0.83     | 0.19 | 269.2   | 20.1 | nd            |
| AD <sub>linker 1-326</sub> | AD <sub>linker 1-321</sub> | 0.86     | 0.16 | 259.3   | 13.7 | nd            |
| AD+RHD                     | AD+RHD                     | 0.59     | 0.22 | 240.7   | 19.4 | 30.8          |
| R49                        | R18A                       | 0.48     | 0.04 | 191.9   | 70.8 | 27.7          |
| R109                       | R77A                       | 0.14     | 0.03 | 78.0    | 26.0 | 32.8          |
| R49+R109                   | R18A+R77A                  | 0.02     | 0.18 | 64.3    | 37.7 | 38.1          |
| D166                       | D134A                      | 0.07     | 0.27 | 159.6   | 60.5 | 35.7          |
| D166+Q196                  | D134A+Q164A                | -0.04    | 0.08 | 72.4    | 19.0 | 37.5          |
| C225                       | C202S                      | 0.83     | 0.33 | 253.4   | 27.8 | 24.9          |
| C225                       | C202K                      | 0.77     | 0.18 | 179.5   | 15.0 | 27.1          |
| C311                       | C305S                      | 0.89     | 0.41 | 398.2   | 32.8 | 27.3          |
| C311                       | C305A                      | 0.93     | 0.11 | 294.8   | 45.6 | 26.4          |
| C225+C311                  | C202S+C305S                | 0.60     | 0.17 | 203.6   | 31.6 | 22.2          |
| C225+T193/P214/T215        | C202S+K161A/K191A/K192A    | 0.76     | 0.33 | 206.6   | 17.6 | nd            |
| C225+C397                  | C202S+C397S                | 1.12     | 0.24 | 257.0   | 21.7 | 25.7          |
| C80                        | C48S                       | 0.36     | 0.16 | 221.6   | 31.3 | 33.4          |
| C164                       | C132S                      | 0.82     | 0.28 | 236.0   | 25.9 | 25.4          |
| A178                       | C146S                      | 0.57     | 0.12 | 281.7   | 7.3  | 26.4          |
| F212                       | C189S                      | 0.35     | 0.04 | 227.4   | 11.7 | 29.6          |
| D176                       | D144A                      | 0.70     | 0.08 | 249.2   | 48.9 | 24.2          |
| Y307                       | Y301A                      | 0.98     | 0.06 | 265.6   | 16.2 | 27.6          |
| R171                       | R139A                      | 0.75     | 0.15 | 178.4   | 31.0 | 28.0          |
| R171+Q196                  | R139A+Q164A                | 0.33     | 0.01 | 101.1   | 18.8 | 34.0          |
| Q196                       | Q164A                      | 0.85     | 0.13 | 277.9   | 16.6 | 23.5          |
| M279                       | M273A                      | 0.87     | 0.25 | 342.8   | 21.3 | 28.2          |
| A313+R314                  | N307A+M308A                | 1.33     | 0.12 | 402.5   | 35.0 | 22.7          |
|                            | 306GGS                     | 0.28     | 0.10 | 303.6   | 50.1 | 22.3          |
| R275                       | R269A                      | 0.27     | 0.26 | 204.2   | 16.9 | 33.7          |
| K278                       | K272A                      | 0.53     | 0.09 | 255.6   | 33.3 | 28.7          |
| R275+K278                  | R269A+K272A                | 0.28     | 0.16 | 202.7   | 10.4 | 33.4          |
| C397                       | C397S                      | 1.59     | 0.26 | 407.9   | 23.3 | 21.3          |
| R398+Y399                  | R398A+R399A                | 1.25     | 0.11 | 306.5   | 52.8 | 22.1          |
| N401+D402                  | Q401A+D402A                | 1.33     | 0.03 | 329.1   | 9.2  | 21.5          |
|                            | WT+UrmG111C                | -0.29    | 0.21 | 20.8    | 2.0  | nd            |
|                            | no Uba4                    |          |      |         |      | 39.0          |



1 **Appendix Table S3 Yeast strains used in this study**

| <b>Strain</b>   | <b>Genotype</b>                      | <b>Background</b> | <b>Source</b>       |
|-----------------|--------------------------------------|-------------------|---------------------|
| <i>uba4</i> Δ   | <i>uba4::G418</i>                    | S288C             | Euroscarf           |
| Uba4_wt         | <i>uba4::3HA-Uba4 HIS</i>            | S288C             | this study          |
| Uba4_R49A       | <i>uba4::3HA-Uba4_R49A HIS</i>       | S288C             | this study          |
| Uba4_R109A      | <i>uba4::3HA-Uba4_R109A HIS</i>      | S288C             | this study          |
| Uba4_R49/109A   | <i>uba4::3HA-Uba4_R49/109A HIS</i>   | S288C             | this study          |
| Uba4_D166A      | <i>uba4::3HA-Uba4_D166A HIS</i>      | S288C             | this study          |
| Uba4_C208/211A  | <i>uba4::3HA-Uba4_C208/211A HIS</i>  | S288C             | this study          |
| Uba4_C225A      | <i>uba4::3HA-Uba4_C225A HIS</i>      | S288C             | Leidel et al., 2009 |
| Uba4_C225K      | <i>uba4::3HA-Uba4_C225K HIS</i>      | S288C             | this study          |
| Uba4_Y307A      | <i>uba4::3HA-Uba4_Y307A HIS</i>      | S288C             | this study          |
| Uba4_C311A      | <i>uba4::3HA-Uba4_C311A HIS</i>      | S288C             | this study          |
| Uba4_R275A      | <i>uba4::3HA-Uba4_R275A HIS</i>      | S288C             | this study          |
| Uba4_K278A      | <i>uba4::3HA-Uba4_K278A HIS</i>      | S288C             | this study          |
| Uba4_M279A      | <i>uba4::3HA-Uba4_M279A HIS</i>      | S288C             | this study          |
| Uba4_R275/M279A | <i>uba4::3HA-Uba4_R275/M279A HIS</i> | S288C             | this study          |
| Uba4_R314A      | <i>uba4::3HA-Uba4_R314A HIS</i>      | S288C             | this study          |
| Uba4_C397A      | <i>uba4::3HA-Uba4_C397A HIS</i>      | S288C             | Leidel et al., 2009 |
| Uba4_R398/Y399A | <i>uba4::3HA-Uba4_R398/Y399A HIS</i> | S288C             | this study          |
| Uba4_N401/D402A | <i>uba4::3HA-Uba4_N401/D402A HIS</i> | S288C             | this study          |
| Uba4_C225/311A  | <i>uba4::3HA-Uba4_C225/311A HIS</i>  | S288C             | this study          |
| Uba4_C225/397A  | <i>uba4::3HA-Uba4_C225/397A HIS</i>  | S288C             | this study          |
| Uba4_C311/397A  | <i>uba4::3HA-Uba4_C311/397A HIS</i>  | S288C             | this study          |

2

1 **Appendix Table S4 Results of mass spectrometry analysis of Urm1 conjugation site.** Mass  
 2 spectrometry identification of Urm1-conjugation sites to CtUba4<sub>C202K</sub> and CtUba4<sub>C202S</sub> with  
 3 peptides containing K-ε-GGH motif of Urm1. Asterisks indicate ambiguous site localisation of  
 4 K-ε-GGH. #PSMs – number of peptide-to-spectrum matches; m/z – mass to charge ratio of  
 5 precursor ion.

| Sample                   |                                      | Protein                                  | Mascot Score | Sequence Coverage | # Peptides | # PSMs   |
|--------------------------|--------------------------------------|------------------------------------------|--------------|-------------------|------------|----------|
| Uba4C202K_A1             |                                      | CtUba4 <sub>C202K</sub>                  | 7396         | 88.06 %           | 109        | 361      |
| K-ε-GGH site             | Sequence of peptides                 | Modifications                            | Mascot Score | # PSMs            | Charge     | m/z [Da] |
| K202                     | KKPPPPSAQTSkGEAGIm                   | K12(GlyGlyHis); M18(Oxidation)           | 62           | 4                 | 2          | 1046.03  |
|                          | KKPPPPSAQTSkGEA                      | K12(GlyGlyHis)                           | 44           | 2                 | 3          | 591.98   |
|                          | KKPPPPSAQTSkGEAGImGPVVGM             | K12(GlyGlyHis); M18,M24(Oxidation)       | 41           | 4                 | 2          | 1324.17  |
|                          | KKPPPPSAQTSkGEAGIM                   | K12(GlyGlyHis)                           | 32           | 4                 | 3          | 692.36   |
|                          | KKPPPPSAQTSkGEAGIMGPVVGMM            | K12(GlyGlyHis)                           | 30           | 1                 | 2          | 1308.17  |
|                          | KKPPPPSAQTSkGEAGImGPVVGMm            | K12(GlyGlyHis); M18,M24,M25(Oxidation)   | 20           | 4                 | 4          | 699.35   |
| K192                     | KkPPPPSAQTSKGEAGImGPVVGMm            | K2(GlyGlyHis); M18,M25(Oxidation)        | 16           | 4                 | 3          | 926.80   |
| Sample                   |                                      | Protein                                  | Mascot Score | Sequence Coverage | # Peptides | # PSMs   |
| Uba4C202K_A2             |                                      | CtUba4 <sub>C202K</sub>                  | 8344         | 86.49 %           | 102        | 401      |
| K-ε-GGH site             | Sequence of peptides                 | Modifications                            | Mascot Score | # PSMs            | Charge     | m/z [Da] |
| K202                     | KKPPPPSAQTSkGEAGIm                   | K12(GlyGlyHis); M18(Oxidation)           | 44           | 1                 | 3          | 697.69   |
|                          | KKPPPPSAQTSkGEA                      | K12(GlyGlyHis)                           | 41           | 2                 | 3          | 591.98   |
|                          | KKPPPPSAQTSkGEAGIM                   | K12(GlyGlyHis)                           | 41           | 2                 | 3          | 692.36   |
|                          | KKPPPPSAQTSkGEAGImGPVVGM             | K12(GlyGlyHis); M18,M24(Oxidation)       | 22           | 1                 | 3          | 883.11   |
|                          | KKPPPPSAQTSkGEAGImGPVVGMM            | K12(GlyGlyHis); M18(Oxidation)           | 17           | 1                 | 4          | 658.59   |
|                          | KKPPPPSAQTSkGEAGIMGPVVGMM            | K12(GlyGlyHis)                           | 16           | 1                 | 3          | 916.13   |
| Sample                   |                                      | Protein                                  | Mascot Score | Sequence Coverage | # Peptides | # PSMs   |
| Uba4C202S_B1             |                                      | CtUba4 <sub>C202S</sub>                  | 7926         | 92.34 %           | 123        | 356      |
| K-ε-GGH site             | Sequence of peptides                 | Modifications                            | Mascot Score | # PSMs            | Charge     | m/z [Da] |
| K90                      | kVDSLITHLIEINPLPVY                   | K1(GlyGlyHis)                            | 34           | 1                 | 3          | 772.43   |
| K124                     | DLTPQNAAQIIkPW                       | K12(GlyGlyHis)                           | 23           | 1                 | 3          | 615.99   |
| K161                     | VSAASVQkSGQLIVL                      | K8(GlyGlyHis)                            | 23           | 1                 | 2          | 875.99   |
|                          | VSAASVQkSGQL                         | K8(GlyGlyHis)                            | 45           | 2                 | 2          | 713.38   |
| K191/K192*               | kKPPPPSAQTSSGEAGIm                   | K1/K2(GlyGlyHis); M18(Oxidation)         | 41           | 6                 | 2          | 1025.50  |
|                          | KkPPPPSAQTSSGEAGIm                   |                                          | 30           |                   |            |          |
|                          | kKPPPPSAQTSSGEAGImGPVVGMM            | K1/K2(GlyGlyHis); M18(Oxidation)         | 30           | 6                 | 3          | 907.78   |
|                          | KkPPPPSAQTSSGEAGImGPVVGMM            |                                          | 20           |                   |            |          |
|                          | kKPPPPSAQTSSGEAGImGPVVGMm            | K1/K2(GlyGlyHis); M18,M24,M25(Oxidation) | 20           | 2                 | 3          | 918.44   |
|                          | KkPPPPSAQTSSGEAGImGPVVGMm            |                                          | 49           |                   |            |          |
|                          | kKPPPPSAQTSSGEAGIm                   | K1/K2(GlyGlyHis)                         | 49           | 4                 | 2          | 1017.51  |
|                          | KkPPPPSAQTSSGEAGIm                   |                                          | 41           |                   |            |          |
|                          | kKPPPPSAQTSSGEAGImGPVVGMM            | K1/K2(GlyGlyHis); M18,M25(Oxidation)     | 41           | 8                 | 3          | 913.11   |
|                          | KkPPPPSAQTSSGEAGImGPVVGMM            |                                          | 29           |                   |            |          |
| kKPPPPSAQTSSGEA          | K1/K2(GlyGlyHis)                     | 29                                       | 2            | 3                 | 578.29     |          |
| KkPPPPSAQTSSGEA          |                                      | 28                                       |              |                   |            |          |
| kKPPPPSAQTSSGEAGImGPVVGM | K1/K2(GlyGlyHis); M18,M24(Oxidation) | 28                                       | 4            | 4                 | 652.32     |          |
| KkPPPPSAQTSSGEAGImGPVVGM |                                      | 26                                       |              |                   |            |          |
| kKPPPPSAQTSSGEAGImGPVVGM | K1/K2(GlyGlyHis); M18(Oxidation)     | 26                                       | 6            | 4                 | 648.32     |          |
| KkPPPPSAQTSSGEAGImGPVVGM |                                      |                                          |              |                   |            |          |
| K225                     | GVAQAGEAIkIL                         | K10(GlyGlyHis)                           | 40           | 2                 | 2          | 710.90   |
|                          | MGVAQAGEAIkIL                        | K11(GlyGlyHis)                           | 26           | 1                 | 3          | 517.95   |
| K295                     | TLDGIkSGNPYVQF                       | K6(GlyGlyHis)                            | 40           | 2                 | 2          | 952.47   |

| Sample       |                                                        | Protein                                     | Mascot Score  | Sequence Coverage | # Peptides | # PSMs   |
|--------------|--------------------------------------------------------|---------------------------------------------|---------------|-------------------|------------|----------|
| Uba4C202S_B2 |                                                        | CtUba4c202s                                 | 7236          | 91.67%            | 117        | 330      |
| K-ε-GGH site | Sequence of peptides                                   | Modifications                               | Mascot Score  | # PSMs            | Charge     | m/z [Da] |
| K10          | SkEEIERY                                               | K2(GlyGlyHis)                               | 20            | 1                 | 3          | 435.55   |
| K90          | kVDSLITHLIEINLPVY                                      | K1(GlyGlyHis)                               | 21            | 1                 | 3          | 772.43   |
| K124         | DLTPQNAAQIIkPW                                         | K12(GlyGlyHis)                              | 34            | 1                 | 3          | 615.99   |
| K161         | VSAASVQkSGQL                                           | K8(GlyGlyHis)                               | 37            | 1                 | 2          | 713.38   |
| K191/K192*   | kKPPPPSAQTSSGEAGImGPVVGm<br>KkPPPPSAQTSSGEAGImGPVVGm   | K1/K2(GlyGlyHis);<br>M18,M24(Oxidation)     | 34            | 2                 | 3          | 869.42   |
|              | kKPPPPSAQTSSGEAGIMGPVVGM<br>KkPPPPSAQTSSGEAGIMGPVVGM   | K1/K2(GlyGlyHis)                            | 18            | 2                 | 4          | 644.32   |
|              | kKPPPPSAQTSSGEAGIm<br>KkPPPPSAQTSSGEAGIm               | K1/K2(GlyGlyHis); M18(Oxidation)            | 44            | 4                 | 2          | 1025.51  |
|              | kKPPPPSAQTSSGEAGImGPVVGMM<br>KkPPPPSAQTSSGEAGImGPVVGMM | K1/K2(GlyGlyHis); M18(Oxidation)            | 40            | 2                 | 3          | 907.78   |
|              | kKPPPPSAQTSSGEA<br>KkPPPPSAQTSSGEA                     | K1/K2(GlyGlyHis)                            | 27            | 4                 | 3          | 578.30   |
|              | kKPPPPSAQTSSGEAGIM<br>KkPPPPSAQTSSGEAGIM               | K1/K2(GlyGlyHis)                            | 27            | 2                 | 3          | 678.68   |
|              | kKPPPPSAQTSSGEAGImGPVVGM<br>KkPPPPSAQTSSGEAGImGPVVGM   | K1(GlyGlyHis); M18(Oxidation)               | 20            | 6                 | 3          | 864.10   |
|              | GVAQAGEAikIL                                           | K10(GlyGlyHis)                              | 43            | 2                 | 2          | 710.90   |
| K225         | MGVAQAGEAikIL                                          | K11(GlyGlyHis)                              | 32            | 1                 | 3          | 517.95   |
|              | GVAQAGEAikILVSQL                                       | K10(GlyGlyHis)                              | 25            | 1                 | 3          | 616.68   |
| K295         | TLDGikSGNPNYVQF                                        | K6(GlyGlyHis)                               | 42            | 2                 | 2          | 952.47   |
| Sample       |                                                        | Protein                                     | Mascot Score  | Sequence Coverage | # Peptides | # PSMs   |
| Uba4C202S_C1 |                                                        | CtUba4c202s                                 | 5800          | 93.24%            | 138        | 260      |
| K-ε-GGH site | Sequence of peptides                                   | Modifications                               | Mascot Score  | # PSMs            | Charge     | m/z [Da] |
| K161         | VSAASVQkSGQL                                           | K8(GlyGlyHis)                               | 37            | 1                 | 2          | 713.376  |
|              | VSAASVQkSGQLIVL                                        | K8(GlyGlyHis)                               | 27            | 2                 | 2          | 875.994  |
| K191/K192*   | kKPPPPSAQTSSGEA<br>KkPPPPSAQTSSGEA                     | K1/K2(GlyGlyHis)                            | 30            | 2                 | 3          | 578.292  |
|              | kKPPPPSAQTSSGEAGImGPVVGm<br>KkPPPPSAQTSSGEAGImGPVVGm   | K1/K2(GlyGlyHis);<br>M18,M24(Oxidation)     | 22            | 4                 | 3          | 869.427  |
|              | kKPPPPSAQTSSGEAGImGPVVGmm<br>KkPPPPSAQTSSGEAGImGPVVGmm | K1/K2(GlyGlyHis);<br>M18,M24,M25(Oxidation) | 46            | 4                 | 3          | 918.440  |
|              | kKPPPPSAQTSSGEAGIm<br>KkPPPPSAQTSSGEAGIm               | K1/K2(GlyGlyHis); M18(Oxidation)            | 42            | 2                 | 2          | 1025.505 |
|              | kKPPPPSAQTSSGE<br>KkPPPPSAQTSSGE                       | K1/K2(GlyGlyHis)                            | 18            | 1                 | 3          | 554.613  |
| K295         | TLDGikSGNPNYVQF                                        | K6(GlyGlyHis)                               | 27            | 1                 | 3          | 635.315  |
| Sample       |                                                        | Protein                                     | Mascot Score  | Sequence Coverage | # Peptides | # PSMs   |
| Uba4C202S_C2 |                                                        | CtUba4c202s                                 | 6064          | 96.17%            | 147        | 262      |
| K-ε-GGH site | Sequence of peptides                                   | Modifications                               | Mascot Score  | # PSMs            | Charge     | m/z      |
| K161         | VSAASVQkSGQL                                           | K8(GlyGlyHis)                               | 36            | 1                 | 2          | 713.37   |
| K191/K192*   | kKPPPPSAQTSSGEAGIm<br>KkPPPPSAQTSSGEAGIm               | K1/K2(GlyGlyHis); M18(Oxidation)            | 56            | 2                 | 2          | 1025.50  |
|              | kKPPPPSAQTSSGE<br>KkPPPPSAQTSSGE                       | K1/K2(GlyGlyHis)                            | 38            | 4                 | 2          | 831.41   |
|              | kKPPPPSAQTSSGEAGImGPVVGmm<br>KkPPPPSAQTSSGEAGImGPVVGmm | K1/K2(GlyGlyHis);<br>M18,M24,M25(Oxidation) | 35            | 4                 | 3          | 918.44   |
|              | kKPPPPSAQTSSGEAGImGPVVGM<br>KkPPPPSAQTSSGEAGImGPVVGM   | K1/K2(GlyGlyHis);<br>M18,M24(Oxidation)     | 30            | 4                 | 4          | 652.32   |
|              | K295                                                   | TLDGikSGNPNYVQF                             | K6(GlyGlyHis) | 25                | 1          | 3        |

1

2

3
